# Supplementary material for: Core outcome set measurement for future clinical trials in acute myeloid leukemia: the HARMONY study protocol using a multi-stakeholder consensus-based Delphi process and a final consensus meeting
Source: Trials. 2020 May 27;21:437. doi: 10.1186/s13063-020-04384-1 (PMC7251906; doi:10.1186/s13063-020-04384-1)
Supplement: Supplementary file 1 — Additional file 1. Preliminary acute myeloid leukemia (AML) outcome list. [file 13063_2020_4384_MOESM1_ESM.xlsx]

## Sheet: Outcomes
Name	HelpText	DomainName
Response - CR (complete remission)	Leukemia gets better, resulting in no evidence of abnormally high levels of "blast cells" in the bone marrow. Also no signs of leukemia detectable outside the bone marrow, and levels of other blood cells return to normal.	Clinical outcome - Event type
Response - CRi (complete remission with incomplete hematologic recovery)	All criteria of CR are met other than return of levels of certain white blood cells (neutrophils and platelets) to normal range.	Clinical outcome - Event type
Response - CR and MRD negative (complete remission and MRD negative)	All criteria of CR are met, plus "residual disease" that can only be detected by very sensitive measures (PCR or flow cytometry) is undetectable within a specific range.	Clinical outcome - Event type
Response - PR (partial remission)	Leukemia gets better, with a substantial reduction of "blast cells" compared to levels before treatment, but not enough to qualify as CR. Also, levels of other blood cells return to normal.	Clinical outcome - Event type
Response - SD (stable disease)	Leukemia stays the same after treatment.	Clinical outcome - Event type
Morphologic leukemia-free state (MLFS)	All criteria of CR related to reduction of "blast cells" in the bone marrow are met and no leukemia is detectable outside the bone marrow. Recovery of bone marrow function or blood cell counts are not considered for this outcome measure.	Clinical outcome - Event type
Relapse - Clinical relapse	Symptomatic return of leukemia after a patient initially responds well to treatment.	Clinical outcome - Event type
Relapse - Biochemical relapse	When a patient has had a positive response to treatment, and despite not having any symptoms has a result on a blood test that suggests that leukemia may be recurring.	Clinical outcome - Event type
Relapse - Molecular relapse	When a patient has had a positive response to treatment, and despite not having any symptoms has a result on a "minimal residual leukemia" test that suggests that leukemia may be recurring.	Clinical outcome - Event type
Cause of death	Death for any reason, whether related to leukemia or not. This records the specific reason for death, not the time until death.	Clinical outcome - Event type
PD (progressive disease)	Worsening of a patient's leukemia defined by a set of specific criteria for their leukemia.	Clinical outcome - Event type
OS (overall survival)	Length of time that a patient remains alive from either the date of diagnosis or the start of treatment for the leukemia.	Clinical outcome - Time to event
PFS (progression free survival)	Time until someone’s leukemia either gets worse or they die from any cause.	Clinical outcome - Time to event
EFS (event free survival)	Time until someone’s leukemia either gets worse, they die from any cause or they stop their treatment because of side-effects.	Clinical outcome - Time to event
DOR (duration of response)	Length of time from responding positively to a treatment to the leukemia starting to recur / to get worse.	Clinical outcome - Time to event
TTP (time to progression)	Time until someone’s leukemia recurs / gets worse (excluding death).	Clinical outcome - Time to event
TTR (time to response)	Time from starting a treatment until a positive response to treatment is documented.	Clinical outcome - Time to event
LFS (leukemia free survival)	Time from receiving a transplant to evidence of leukemia getting worse.	Clinical outcome - Time to event
DSS (disease specific survival)	Time until someone dies from leukemia, but not from other causes.	Clinical outcome - Time to event
RFS (relapse free survival)	Time from achieving a leukemia-free state, to treatment until leukemia recurs.	Clinical outcome - Time to event
WBC (white blood cells)	Number of cells of the immune system that are involved in fighting leukemia but may also grow out of control, causing leukemia at diagnosis.	Clinical outcome - clinical parameter
Infections	How often and how bad a patient gets sick or picks up a bacterial, viral or fungal infection, that needs antibacterial or antifungal treatment. Number of bacterial, viral or fungal infections, that needs antibacterial or antifungal treatment.	Clinical outcome - clinical parameter
Use of G-CSF	Treatment given to help a patient to make a certain type of white blood cell called a neutrophil that is sometimes reduced in number because of treatment given or the patient's leukemia.	Clinical outcome - clinical parameter
Bleeding	Number of events recorded when a patient has an unexpected bleeding event, which may indicate a deficiency or issue with a certain type of blood cell, and may require transfusions or other interventions.	Clinical outcome - clinical parameter
Marrow MRD negativity	No detection of leukemia using very sensitive techniques to analyze bone marrow blood samples.	Clinical outcome - MRD
MRD cytogenetic	The level of leukemia that can be detected as measured by looking at how many cells there are with certain changes in the chromsomes.	Clinical outcome - MRD
MRD molecular	The level of leukemia that can be detected as measured by using a DNA sequencing technique.	Clinical outcome - MRD
MRD negativity post consolidation therapy	No detection of leukemia using specific techniques after the end of "consolidation" therapy, ie the completion of standard leukemia therapy with subsequent bone marrow transplantation.	Clinical outcome - MRD
AEs (adverse events) according to CTCAE v 4.0	A negative event or side-effect that happens during or after treatment, classified according to the latest "Common Terminology Criteria for Adverse Events", a descriptive terminology of adverse events. For each adverse event there is a grading for severity.	Safety outcome - AE / Toxicity
SAEs (serious adverse event)	A negative event that happens during or after treatment that is life-threatening or results in death, that requires hospitalisation or an extension of hospitalisation, that causes a birth defect or that needs treatment to prevent permanent damage.	Safety outcome - AE / Toxicity
Discontinuation of treatment	Patient decides to stop treatment themselves or under the direction of his/her doctor for any reason other than finishing a course of treatment.	Safety outcome - AE / Toxicity
Hematological toxicity	Side-effects that cause changes in the blood or number of blood cells.	Safety outcome - AE / Toxicity
Non-Hematological toxicity	Side-effects that cause changes anywhere other than in the blood, e.g. nausea, neuropathy, mucositis, renal or liver failure, infections.	Safety outcome - AE / Toxicity
SPM (second primary malignancies)	A new cancer occurring in someone who has had a cancer in the past. It is different to recurrence, which is where the original cancer has returned.	Safety outcome - AE / Toxicity
GVHD (graft versus host disease)	Side-effect that can happen after somebody gets a bone marrow or stem cell transplant from somebody else, when the immune cells from the donor attack the body of the person given the transplant.	Safety outcome - AE / Toxicity
Tolerability related outcomes	Measurement of how well patients are able to manage side-effects and whether they need to reduce dose or stop treatment as a result.	Safety outcome - AE / Toxicity
Fatigue	Feeling more lethargic and tired than normal.	PRO / HR-QoL - general - non-clinical
Insomnia	Finding it difficult to get to sleep or to stay asleep.	PRO / HR-QoL - general - non-clinical
Pain	Unpleasant physical sensation, which may vary in intensity from mild discomfort to pain that limits activities of daily life, limits self care and/or requires medication or hospitalisation. Medication may be necessary.	PRO / HR-QoL - general - non-clinical
Diarrhea / constipation	Passing looser stools (poo) or passing stools more often than is normal for you / Having difficulty passing stools (poo), which may be small and hard.	PRO / HR-QoL - general - non-clinical
Nausea	Feeling or being sick, which may lead to impact on intake of food and/or fluids and/or normal activities.	PRO / HR-QoL - general - non-clinical
Anxiety	Feelings of constant worry, or deep concern or uneasy about uncertainties.	PRO / HR-QoL - general - non-clinical
Dyspnoea	Shortness of breath, which may happen at rest and may limit activities of daily living or self care, and may require treatment.	PRO / HR-QoL - general - non-clinical
Anorexia	Loss of appetite, which may lead to weight loss and malnutrition.	PRO / HR-QoL - general - non-clinical
Cognitive problems	Problems with mental processes of perception, memory, judgment and reasoning.	PRO / HR-QoL - general - non-clinical
Depression	Feelings of severe sadness and unhappiness, often with decreased energy, constant feelings of guilt, doubt or self-blame, worthlessness and hopelessness.	PRO / HR-QoL - general - non-clinical
Sensory neuropathy	Problems involving damage to the peripheral nerves (those that connect the limbs and organs to the central nervous sysem and control sensation, movement and coordination) or symptoms caused by those issues, including numbness, tingling or burning sensations, increased sensivity to touch, weakness or dysfunction especially of extremities.	PRO / HR-QoL - general - non-clinical
Psychological function	The effect of leukemia or its treatment on psychological function; for example thinking and feeling.	PRO / HR-QoL - PRO domains
Physical function	The effect of leukemia or its treatment on day to day physical activities; for example, walking, climbing stairs, driving.	PRO / HR-QoL - PRO domains
Social function	The effect of leukemia or its treatment on relationships with partner, family and friends including ability to join in with social activities.	PRO / HR-QoL - PRO domains
Role function	The effect of leukemia or its treatment on your role; for example, ability to look after children or to work or earn money.	PRO / HR-QoL - PRO domains
Finances	Financial losses because of co-payment for medical treatment, and if a patient was working before disease diagnosis or progression, loss of salary during sick leave, which may include leave taken by a carer.	PRO / HR-QoL - PRO domains
Eating and drinking	The effect of leukemia or its treatment on eating and drinking.	PRO / HR-QoL - PRO domains
Hospitalization days	Total days you are in hospital specifically because of leukemia or side effects in addition to planed days in hospital for treatment.	Health resource utilization - resource use
cost of leukemia treatment	Money which must be spend on leukemia treatment.	Health resource utilization - resource use
Emergency Unit admissions	Emergency or unplanned hospital treatment is necessary.	Health resource utilization - resource use
Intensive care admissions	Requirement for treatment on an intensive care ward due to serious or life threatening disease progression or side-effects.	Health resource utilization - resource use
Outpatient visits	Treatment or diagnostic visits in hospital without spending a night there.	Health resource utilization - resource use
Need of care giver assistance	Requirement for assistance given by caregiver (who could be a family member, friend or a professional care giver) in or outside the hospital.	Health resource utilization - resource use
